# Supplementary material
Source: PubMed Central journal article supplement (PMC4432742)
Supplement: IAI.02461-14_zii999091258so1.pdf [file IAI.02461-14_zii999091258so1.pdf]

Suppl. Fig. 1

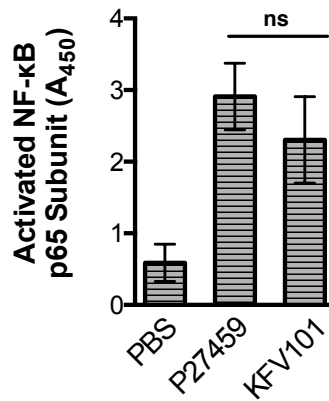

**Suppl. Fig. 1. *V. cholerae* induces activation of NF-κB independent of priming with *E. coli* LPS and does not depend on secreted toxins.** THP-1 cells were either mock-treated with PBS or treated at MOI 25 with *V. cholerae* wild-type El Tor strain P27459 or its isogenic mult toxin deletion derivative KfV101 ( $\Delta ctxAB\Delta hlyA\Delta rtxA\Delta hapA$ ) for 45 min. Cell lysates were assayed for the p65 subunit of activated NF-κB using the NF-κB p65 InstantOne ELISA Kit (eBioscience) according to manufacturer's recommended protocol.

**Suppl. Fig. 2**

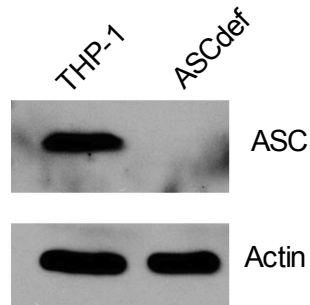

**Suppl. Fig. 2. ASCdef cells do not produce ASC.** Untreated THP-1 ASCdef cells collected and tested for ASC compared to wild type THP-1 cells by western blotting.

Suppl. Fig. 3

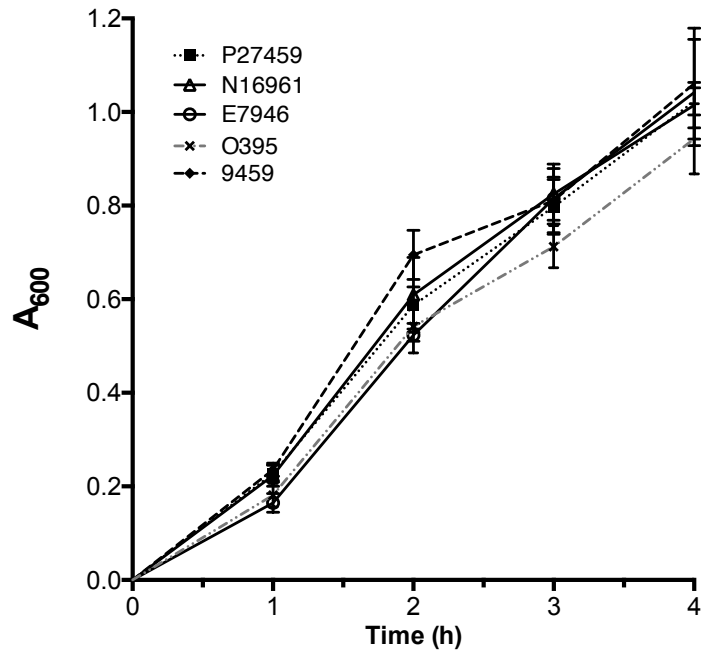

**Suppl. Fig. 3. El Tor and Classical strains grow equally well.** Overnight cultures of *V. cholerae* as indicated were sub-cultured into fresh LB broth and bacteria were grown with shaking at 37°C. Optical density at A<sub>600</sub> was measured hourly.

**Suppl. Fig. 4**

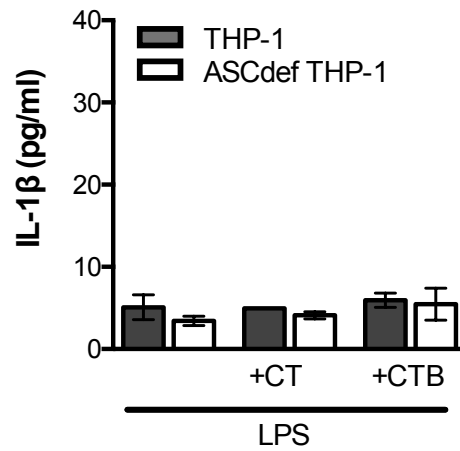

**Suppl. Fig. 4. LPS alone does not alone stimulate IL-1 $\beta$  secretion from THP-1 cells.** IL-1 $\beta$  secretion from THP-1 (gray bars) or ASCdef THP-1 (white bars) from cells treated THP-1 cells were primed with 10  $\mu$ g Ultra-Pure LPS from *E. coli* O111:B4 (List Biological Laboratories) for 5 h, followed by 16 h of stimulation with 10  $\mu$ g cholera toxin (CT), or 10  $\mu$ g cholera toxin B-subunit pentamer (CTB) (List Biological Laboratories).

Suppl. Fig. 5

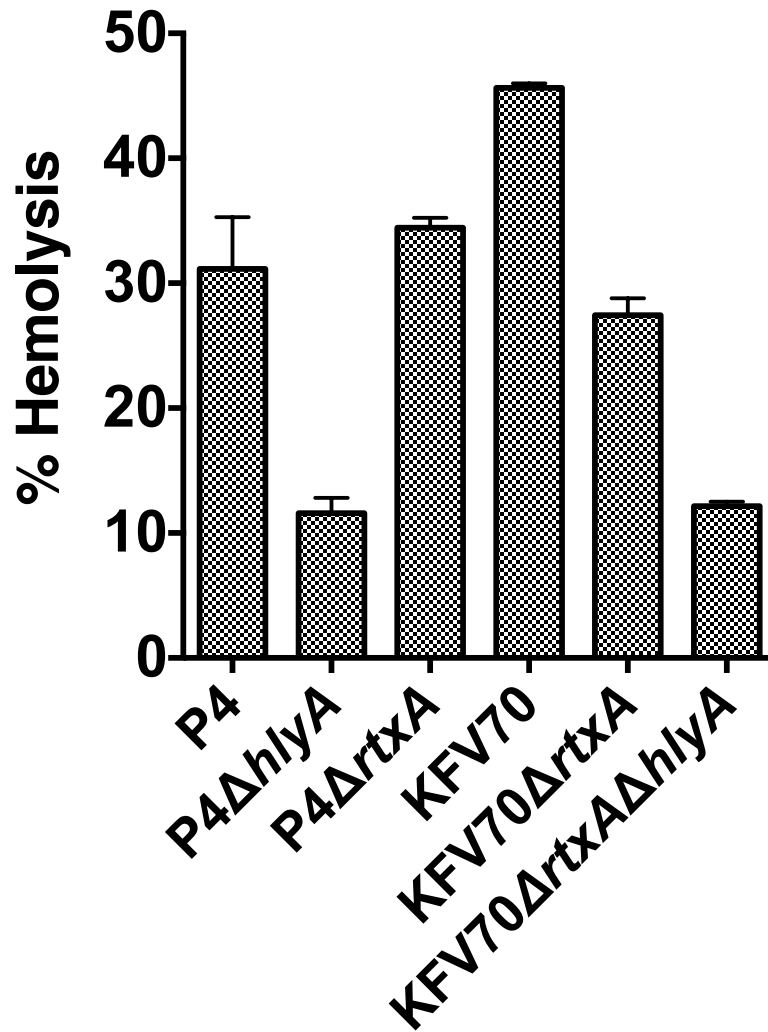

**Suppl. Fig. 5. *ΔhlyA* mutants do not secrete hemolysin.** Strain shown on plates in Figure 2 were grown to mid-log phase in LB and supernatant fluids were assayed for lysis of sheep red blood cells. Hemolysis was measured at  $A_{540}$  and percent hemolysis compared to a 100% hemolysis control induced by 1% TritonX-100. KFV70ΔrtxAΔhlyA is the same strain as KFV101.

**Suppl. Fig. 6**

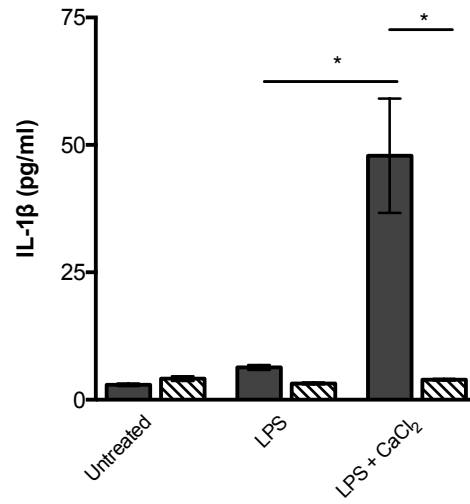

**Suppl. Fig. 6.** NLRP3<sup>def</sup> THP-1 cells purchased from Invivogen do not respond to LPS in the presence of 2 mM CaCl<sub>2</sub>, an inflammasome stimulatory pathway known to depend on NLRP3.

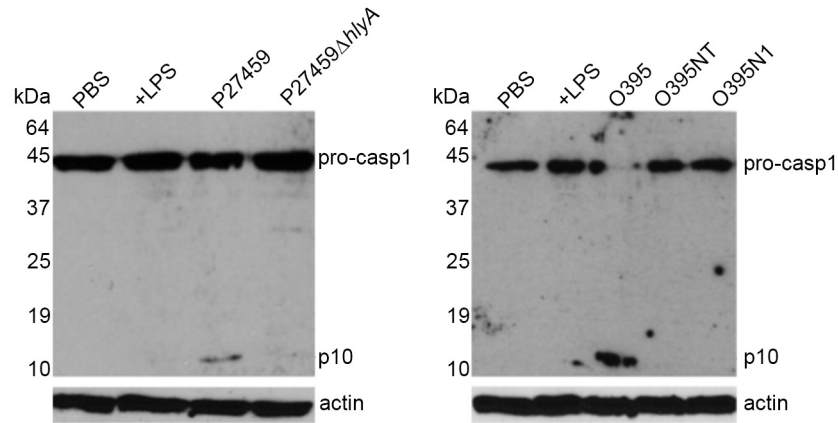

**Suppl. Fig. 7. *V. cholerae* induces production of pro- IL-1 $\beta$  and processing of caspase 1.** THP-1 cells were treated at MOI 25 for 5 min with LPS, wild-type *V. cholerae* El Tor strain P27459 or an isogenic *hlyA* deletion strain (left panels), or with classical strain O395 or  $\Delta$ *ctxA* or  $\Delta$ *ctxAB* mutants (right panels). Cellular lysates were collected and caspase-1 activation was assayed by western blotting.

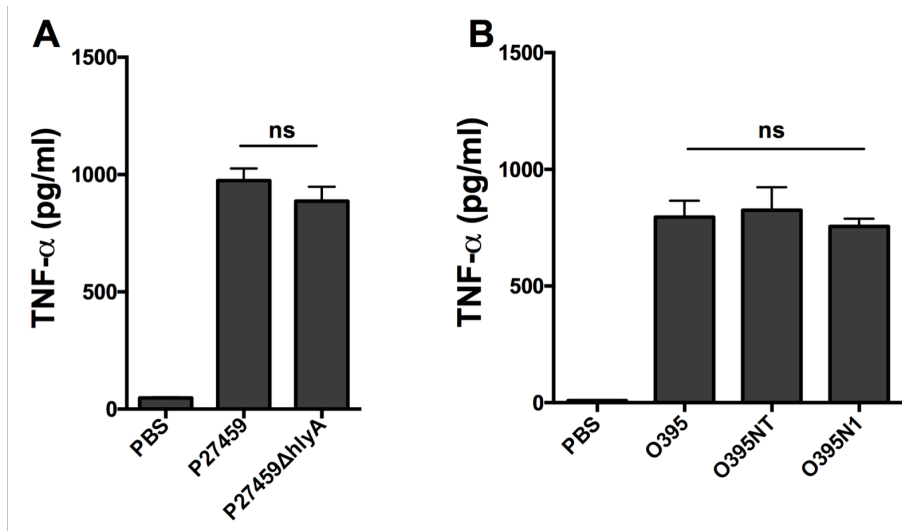

**Suppl. Fig. 8. *V. cholerae* induces secretion of TNF- $\alpha$  independent of toxins.** (A) THP-1 cells were treated at MOI 25 for 3 h with wild-type *V. cholerae* El Tor strain P27459 or an isogenic *hlyA* deletion strain. (B) THP-1 cells were treated at MOI 25 for 3 h followed by incubation in fresh media containing gentamicin for 13 h with wild-type *V. cholerae* classical strain O395 or  $\Delta$ *ctxA* or  $\Delta$ *ctxAB* mutants. (A,B) Supernatant fluids were collected and assayed for TNF- $\alpha$  by ELISA. Data are presented as mean  $\pm$  SD of triplicate samples. \* $p < 0.05$ .



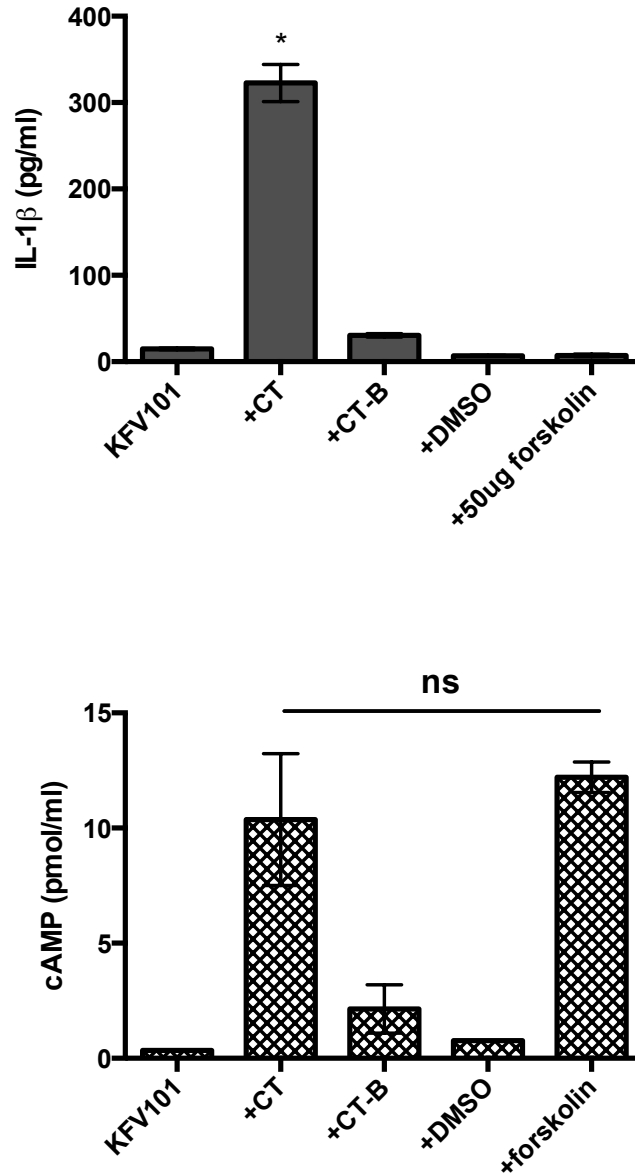

**Suppl. Fig. 9. *V. cholerae* but not forskolin induces IL-1 $\beta$  secretion.** THP-1 cells were treated with CT, CTB, forskolin, or DMSO as vehicle control for 1 h, and then treated at MOI 25 for 3 h with El Tor multotoxin deficient strain KFV101 (P27459 $\Delta$ ctxAB $\Delta$ hlyA $\Delta$ rtxA $\Delta$ hapA). (A) Supernatant fluids were collected and assayed for IL-1 $\beta$  by ELISA. (B) Cellular lysates were collected and assayed for cAMP production by ELISA. \* $p < 0.05$ . ns: not statistically significant. Data are presented as means  $\pm$  SD of triplicate samples.
